# Supplementary material for: Cubic core–shell structure of NiCoSx/CoS2 as a high-efficiency tri-functional catalyst for Zn–air battery and overall water splitting
Source: Royal Society of Chemistry journal article supplement (doi:10.1039/d2ce00364c), 2022-01-01
Supplement: d2ce00364c1.pdf [file d2ce00364c1.pdf]

## Cubic core-shell structure of $\text{NiCoS}_x/\text{CoS}_2$ as high-efficiency tri-functional catalyst for Zn-air battery and overall water splitting

Bingqian Wang, Jianyu Liu, Huaiyun Ge, Siwei Fan, Guanghui Zhang, Lingxue Zhao and Guangda Li\*

School of Materials Science and Engineering, Qilu University of Technology (Shandong Academy of Sciences), Shandong, Jinan 250353, China

Corresponding author.

E-mail address: ligd@qlu.edu.cn

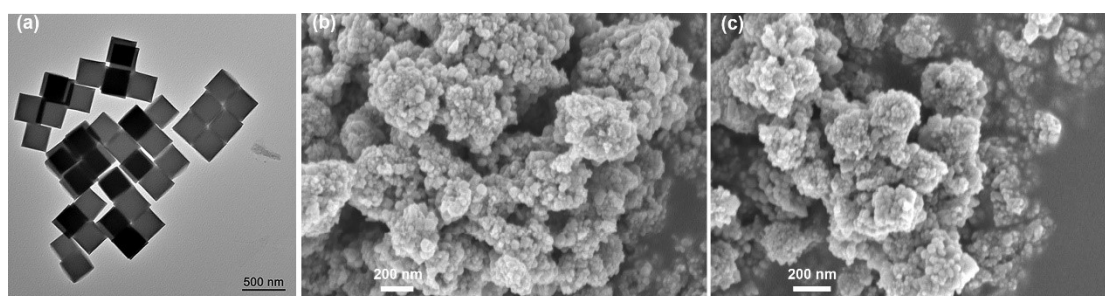

Fig. S1 (a) TEM images of the  $\text{Ni}_3[\text{Co}(\text{CN})_6]_2$ . (b~c) SEM images of the  $\text{NiCoS}_x$  without  $\text{Co}(\text{OH})_2$ .

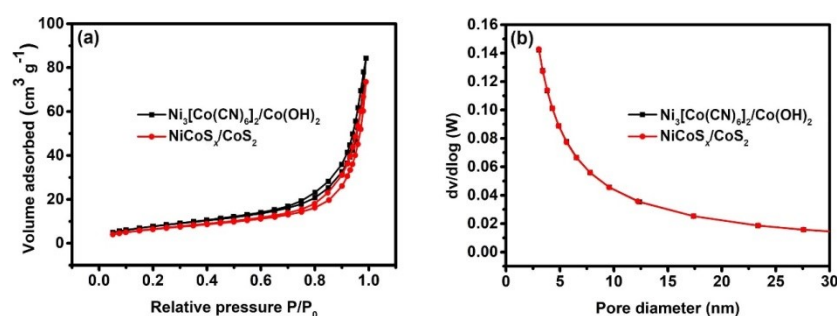

Fig. S2 The nitrogen adsorption-desorption isotherms (a) and the corresponding pore size distribution curves (b) of  $\text{Ni}_3[\text{Co}(\text{CN})_6]_2/\text{Co}(\text{OH})_2$  and  $\text{NiCoS}_x/\text{CoS}_2$ .

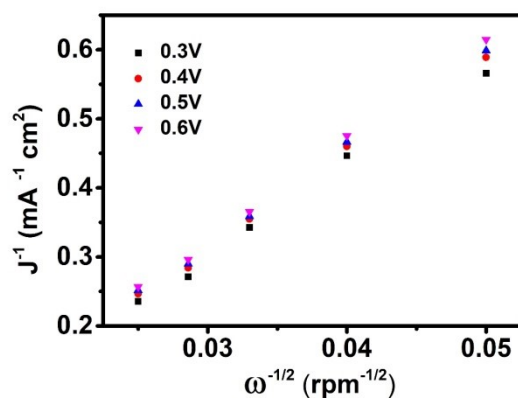

Fig. S3 K-L plots at 0.3 V, 0.4 V, 0.5 V, 0.6 V potentials for NiCoS<sub>x</sub>/CoS<sub>2</sub>.

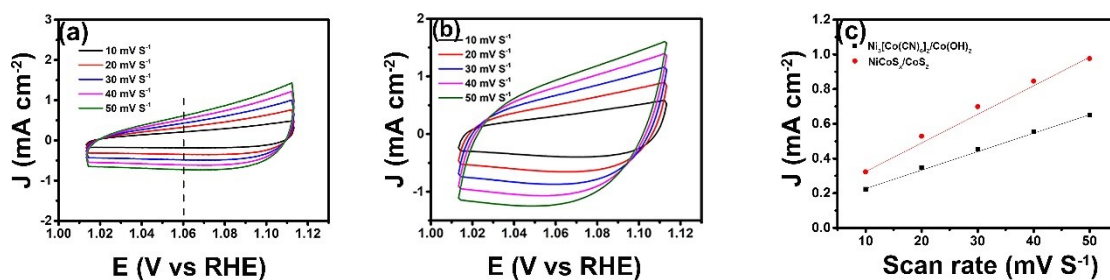

Fig. S4 CV curves of Ni<sub>3</sub>[Co(CN)<sub>6</sub>]<sub>2</sub>/Co(OH)<sub>2</sub> (a), NiCoS<sub>x</sub>/CoS<sub>2</sub> (b), in the potential range of 1.006 - 1.106 V (vs. RHE). (c) The corresponding linear fitting of the capacitive current densities vs. the scan rate.

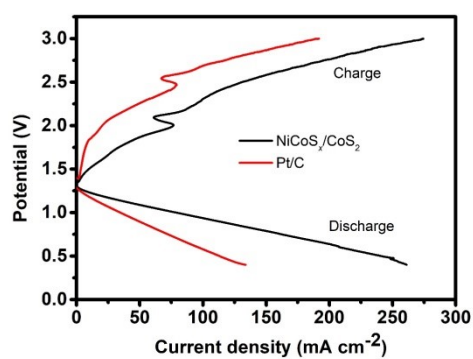

Fig. S5 Charge/discharge polarization curves of the rechargeable liquid ZABs based on the Pt/C catalyst and NiCoS<sub>x</sub>/CoS<sub>2</sub> catalyst, respectively.

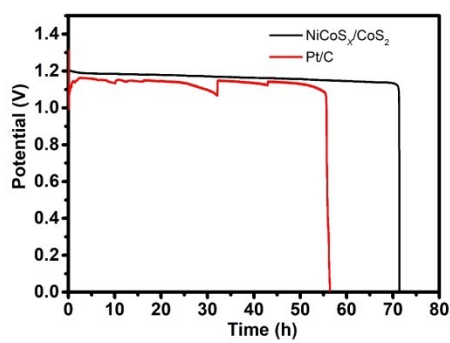

Fig. S6. Typical discharge curves of the rechargeable liquid ZABs based on the Pt/C catalyst and NiCoS<sub>x</sub>/CoS<sub>2</sub> catalyst, respectively.

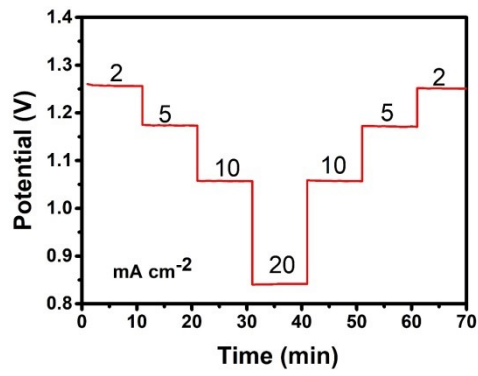

Fig. S7 Rate performance of NiCoS<sub>x</sub>/CoS<sub>2</sub> at different current densities.

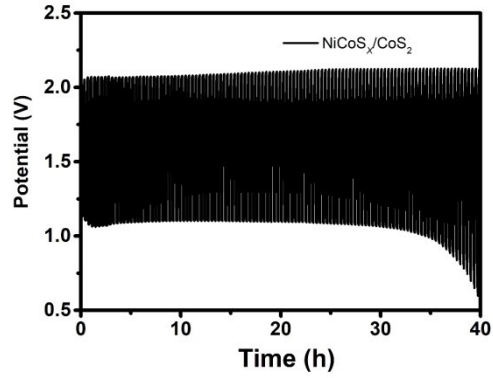

Fig. S8 Cycling stability of NiCoS<sub>x</sub>/CoS<sub>2</sub> at 10 mA cm<sup>-2</sup> charge/discharge.

Table S1 Comparison of the performance of the as-prepared other Co-based Ni-based sulfides catalysts ORR performance.

| <i>Catalyst</i>                          | $E_{1/2}$ | <i>Electrolyte</i> | <i>Ref.</i> |
|------------------------------------------|-----------|--------------------|-------------|
| NiCoS <sub>x</sub> /CoS <sub>2</sub>     | 0.80      | 0.1 M KOH          | This work   |
| CoS <sub>2</sub> @MXene                  | 0.80      | 0.1 M KOH          | 1           |
| N, P/CoS <sub>2</sub> @TiO <sub>2</sub>  | 0.71      | 0.1 M KOH          | 2           |
| CuS/NiS <sub>2</sub>                     | 0.80      | 0.1 M KOH          | 3           |
| Co <sub>9</sub> S <sub>8</sub> @NS-3DrGO | 0.82      | 1 M KOH            | 4           |

Table S2 Comparison of the performance of the as-prepared other Co-based Ni-based sulfides catalysts OER performance.

| <i>Catalyst</i>                      | $E_{j=20}$ | <i>Electrolyte</i> | <i>Ref.</i> |
|--------------------------------------|------------|--------------------|-------------|
| NiCoS <sub>x</sub> /CoS <sub>2</sub> | 1.54       | 0.1 M KOH          | This work   |
| NiCo <sub>2</sub> S <sub>4</sub>     | 1.56       | 1 M KOH            | 5           |
| NiPS                                 | 1.63       | 1 M KOH            | 6           |
| NiS <sub>2</sub>                     | 1.48       | 1 M KOH            | 7           |
| S-NiCoP/CC                           | 1.55       | 1 M KOH            | 8           |

1. S. Han, Y. Chen, Y. Hao, Y. Xie, D. Xie, Y. Chen, Y. Xiong, Z. He, F. Hu and L. Li, *Science China Materials*, 2021, **64**, 1127-1138.
2. L. Guo, J. Deng, G. Wang, Y. Hao, K. Bi, X. Wang and Y. Yang, *Advanced Functional Materials*, 2018, **28**, 1804540.
3. L. An, Y. Li, M. Luo, J. Yin, Y. Q. Zhao, C. Xu, F. Cheng, Y. Yang, P. Xi and S. Guo, *Advanced Functional Materials*, 2017, **27**, 1703779.
4. Y. Li, Y. Zhou, H. Wen, J. Yang, C. Maouche, Q. Liu, Y. Wu, C. Cheng, J. Zhu and X. Cheng, *Dalton Transactions*, 2018, **47**, 14992-15001.
5. Y. Xue, Z. Zuo, Y. Li, H. Liu and Y. Li, *Small*, 2017, **13**, 1700936.
6. M. Wang, A. Saad, X. Li, T. Peng, Q.-T. Zhang, M. Kumar and W. Zhao, *Dalton Transactions*, 2021, **50**, 12870-12878.
7. S. Huang, Z. Jin, P. Ning, C. Gao, Y. Wu, X. Liu, P. Xin, Z. Chen, Y. Jiang and Z. Hu, *Chemical Engineering Journal*, 2021, **420**, 127630.
8. L. Mai-Thi, N. Hoang-Thy and Q. Bui, *Materials Chemistry and Physics*, 2021, **270**, 124746.
